# Supplementary material for: Melatonin promotes the proliferation of GC-1 spg cells by inducing metallothionein-2 expression through ERK1/2 signaling pathway activation
Source: PubMed Central journal article supplement (PMC5630359; doi:10.18632/oncotarget.20019), 2017-08-07
Supplement: oncotarget-08-65627-s001.pdf [file oncotarget-08-65627-s001.pdf]

## Melatonin promotes the proliferation of GC-1 spg cells by inducing metallothionein-2 expression through ERK1/2 signaling pathway activation

### SUPPLEMENTARY MATERIALS

**Supplementary Table 1: Differentially expressed mRNAs between control (C) and melatonin-treated (M) group in GC-1 spg cells, showing as the fold changes of M/C expression values**

| Genes<br>(Upregulation) | Fold change | Genes<br>(Downregulation) | Fold change |
|-------------------------|-------------|---------------------------|-------------|
| <i>Ccne1</i>            | 1.3         | <i>Bbc3</i>               | 0.8         |
| <i>Erc1</i>             | 2.2         | <i>Prrg2</i>              | 0.3         |
| <i>Them4</i>            | 2.1         | <i>Lamc2</i>              | 0.5         |
| <i>Coq3</i>             | 2.2         | <i>Psd4</i>               | 0.2         |
| <i>Mettl10</i>          | 2.3         | <i>Tceanc2</i>            | 0.0         |
| <i>Mt2</i>              | 2.0         | <i>Ptprf</i>              | 0.5         |
| <i>Traf3ip1</i>         | 2.3         | <i>Dbn1</i>               | 0.5         |
| <i>Zfp580</i>           | 2.2         | <i>Mtg1</i>               | 0.4         |
| <i>Ttc26</i>            | 2.2         | <i>Ppp1r3f</i>            | 0.5         |
| <i>Gm10184</i>          | 2.1         | <i>Ccr4</i>               | 0.5         |
| <i>Gm26870</i>          | 2.9         | <i>Olfir368</i>           | 0.5         |
|                         |             | <i>Klhdc1</i>             | 0.4         |
|                         |             | <i>Ccdc171</i>            | 0.5         |
|                         |             | <i>Kcnn4</i>              | 0.8         |
|                         |             | <i>Gm15298</i>            | 0.5         |
|                         |             | <i>4933407K13Rik</i>      | 0.3         |
|                         |             | <i>RP23-246J18.5</i>      | 0.4         |
